# Supplementary material for: Inhibition of METTL3 in macrophages provides protection against intestinal inflammation
Source: Springer Nature journal article supplement (doi:10.1038/s41423-024-01156-8), 2024-04-22

Figure 4D

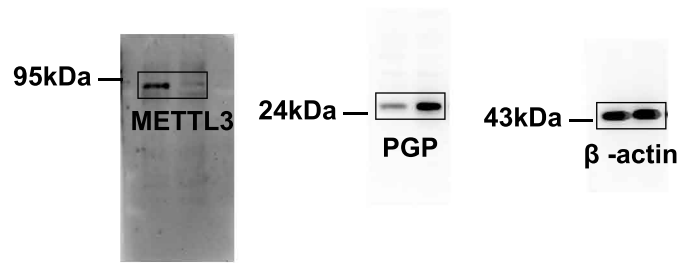

Figure 4K

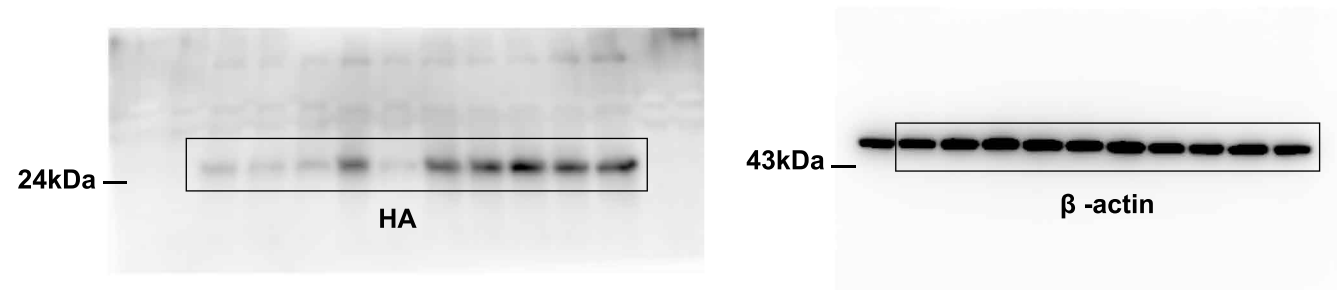

Figure 4M

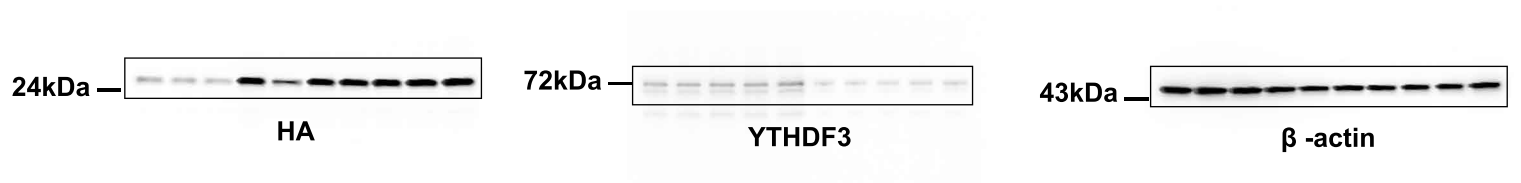

Figure 7C

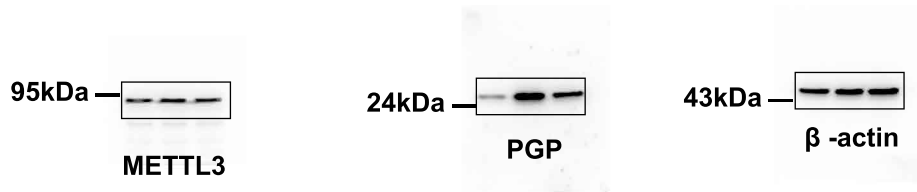

Supplementary Figure 4C

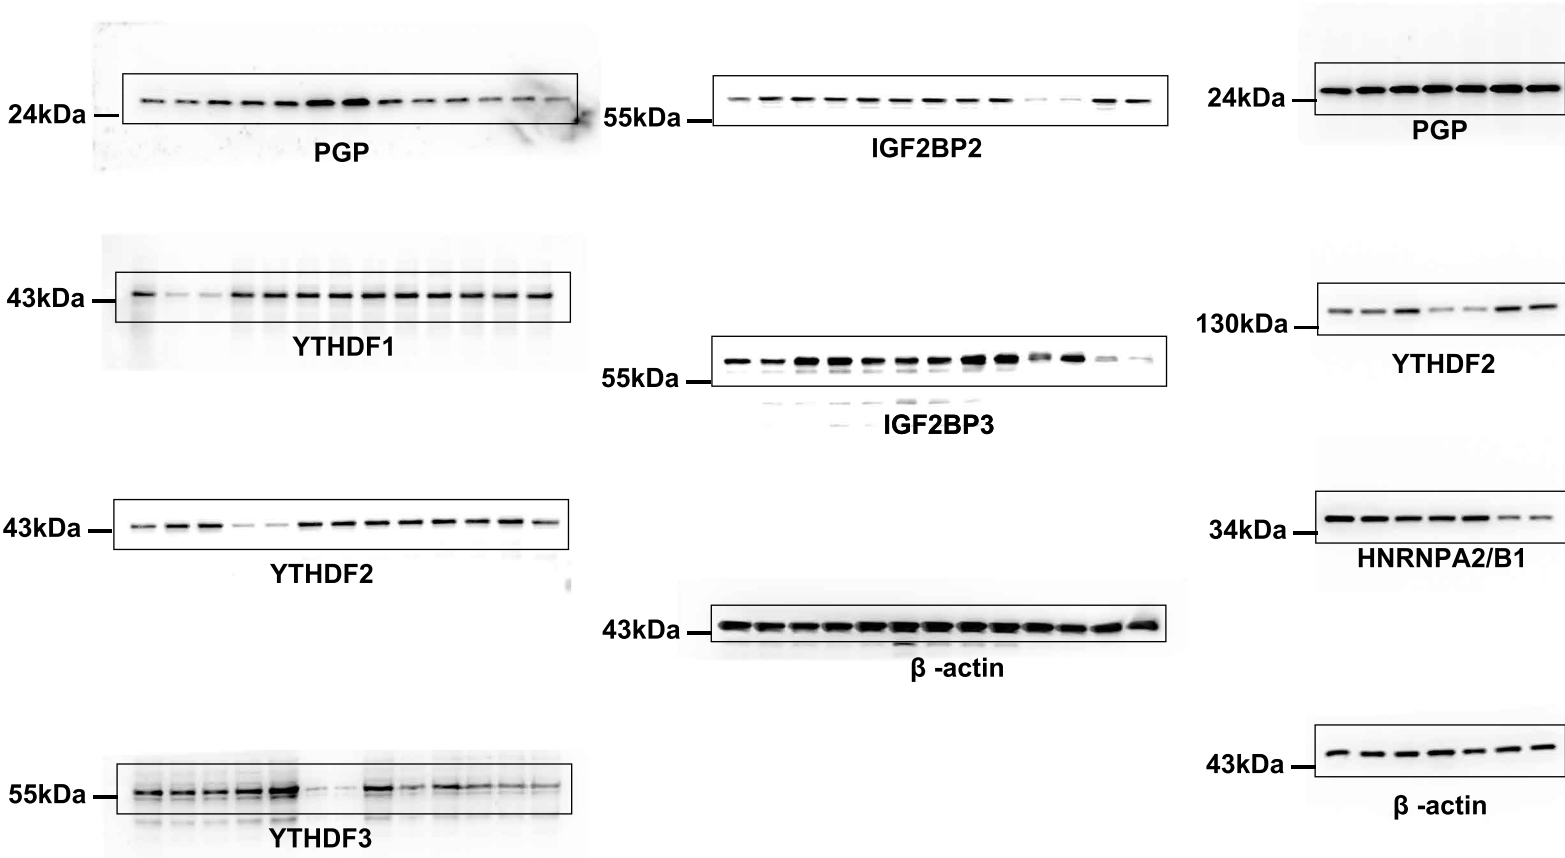

Supplementary Figure 5C

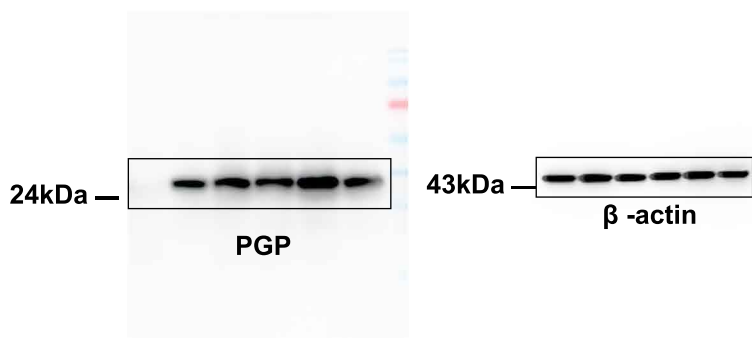

Supplementary Figure 5D

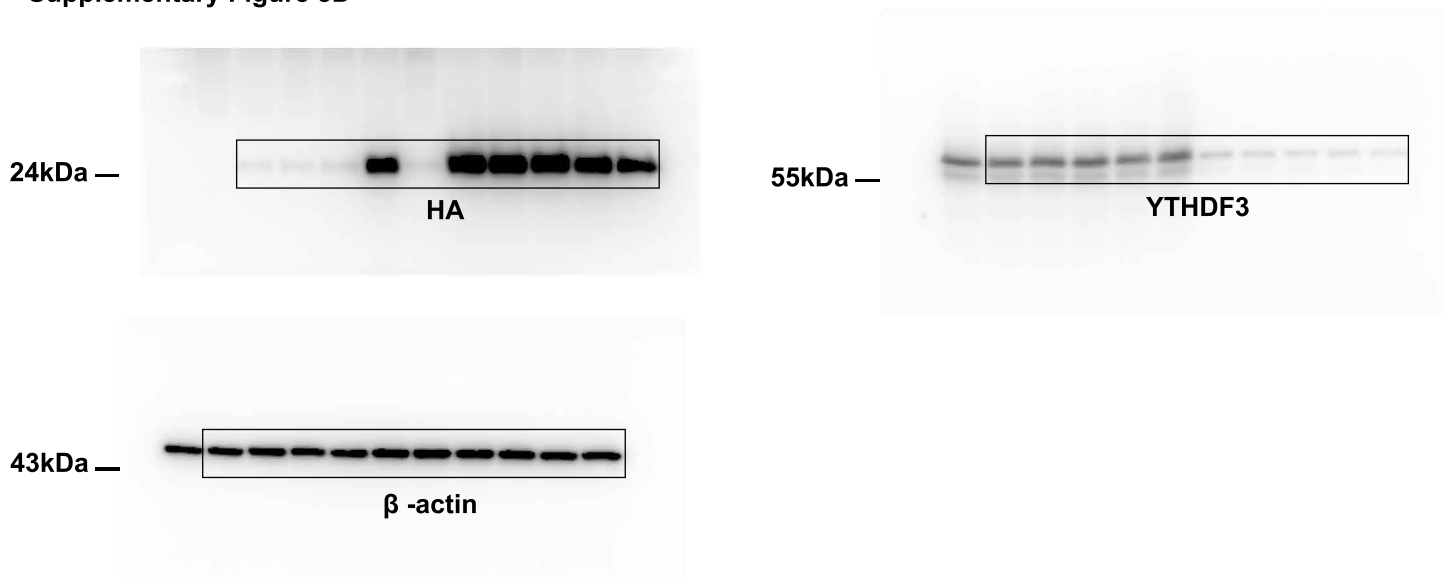

Supplementary Figure 5E

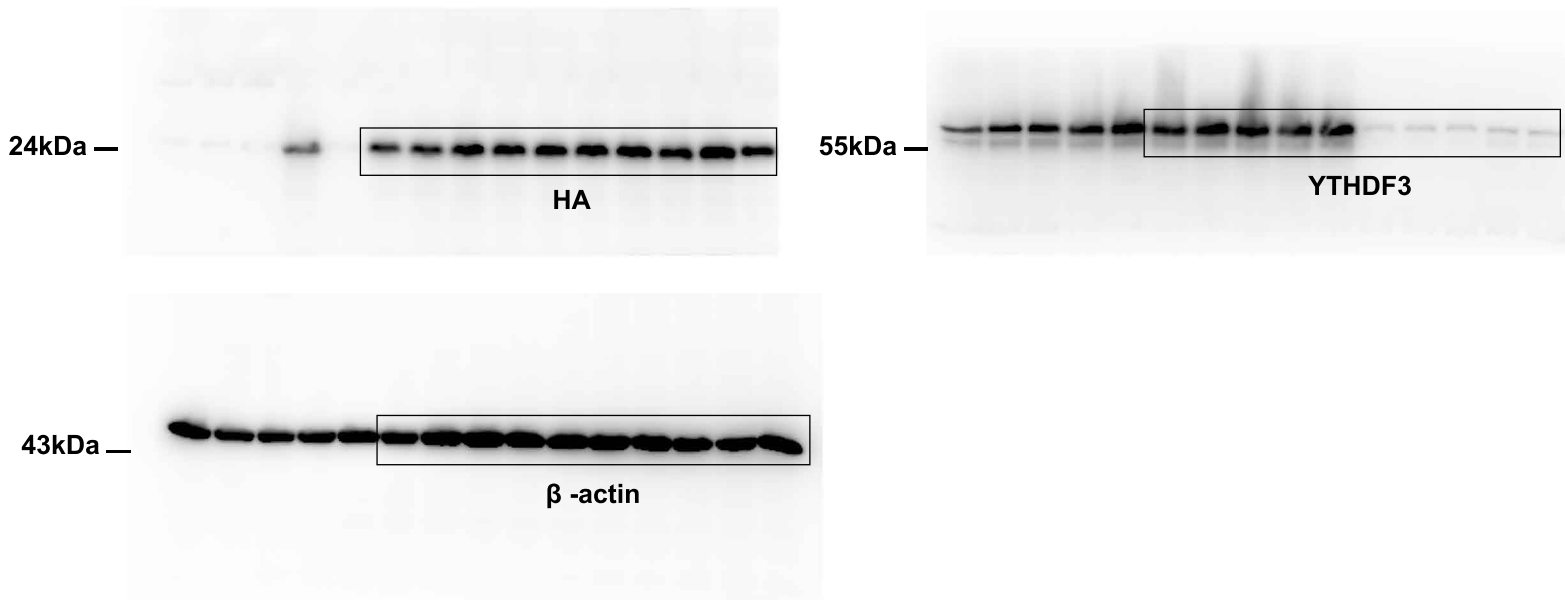

Supplementary Figure 7A

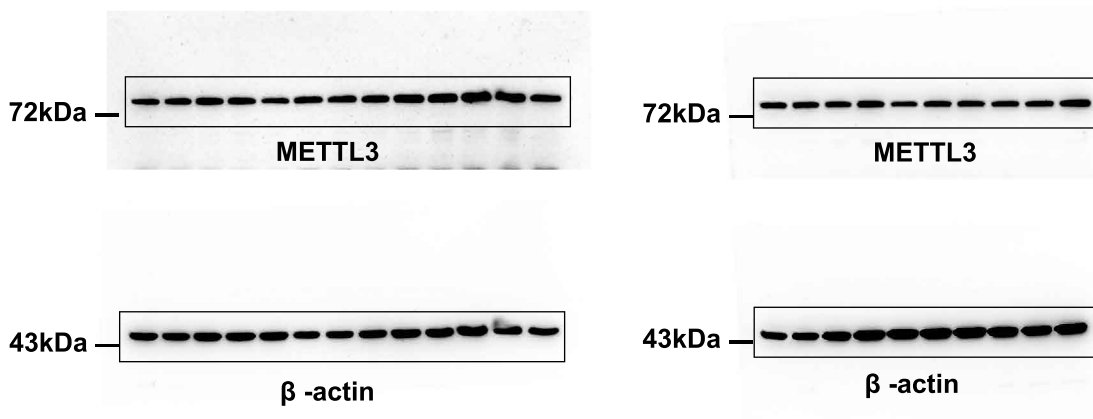

Supplement: 41423_2024_1156_MOESM2_ESM.pdf [file 41423_2024_1156_MOESM2_ESM.pdf]
